# Supplementary material
Source: PubMed Central journal article supplement (PMC9206421)
Supplement: 11427_2021_2115_MOESM2_ESM.pdf [file 11427_2021_2115_MOESM2_ESM.pdf]

**Table S1. Baseline demographics, clinical, laboratory characteristics and outcomes of Delta variant-infected patients with different duration of viral shedding**

|                                                  | Total<br>(n=374)  | Viral shedding ><br>21 days<br>(n=255) | Viral shedding ≤<br>21 days<br>(n=119) | P value |
|--------------------------------------------------|-------------------|----------------------------------------|----------------------------------------|---------|
| <b>Demographics and clinical characteristics</b> |                   |                                        |                                        |         |
| Sex                                              |                   |                                        |                                        | 0.173   |
| Female                                           | 227 (60.7)        | 161 (63.1)                             | 66 (55.5)                              |         |
| Male                                             | 147 (39.3)        | 66 (55.5)                              | 53 (44.5)                              |         |
| Age, years                                       | 50 (39-65)        | 50 (41-66)                             | 49 (34-61)                             | 0.066   |
| 18-59                                            | 258 (69.0)        | 169 (66.3)                             | 89 (74.8)                              | 0.119   |
| ≥60                                              | 116 (31.0)        | 86 (33.7)                              | 30 (25.2)                              |         |
| With any comorbidity                             | 106 (28.3)        | 75 (29.4)                              | 31 (26.1)                              | 0.502   |
| Hypertension                                     | 78 (20.9)         | 57 (22.4)                              | 21 (17.6)                              | 0.34    |
| Diabetes                                         | 31 (8.3)          | 25 (9.8)                               | 6 (5.0)                                | 0.158   |
| Heart disease                                    | 12 (3.2)          | 7 (2.7)                                | 5 (4.2)                                | 0.531   |
| Carcinoma history                                | 8 (2.1)           | 8 (3.1)                                | 0 (0.0)                                | 0.06    |
| Asthma                                           | 6 (1.6)           | 5 (2.0)                                | 1 (0.8)                                | 0.669   |
| Autoimmune diseases                              | 4 (1.1)           | 3 (1.2)                                | 1 (0.8)                                | 1.000   |
| Vaccination Status                               |                   |                                        |                                        | 0.021   |
| Unvaccinated                                     | 115 (30.7)        | 89 (34.9)                              | 26 (21.8)                              |         |
| Partially vaccinated                             | 74 (19.8)         | 51 (20.0)                              | 23 (19.3)                              |         |
| Fully vaccinated                                 | 185 (49.5)        | 115 (45.1)                             | 70 (58.8)                              |         |
| Time from illness onset to hospitalization, days | 2.0 (1.0- 4.0)    | 3.0 (1.0- 4.0)                         | 2.0 (1.0- 4.0)                         | 0.325   |
| <b>Symptoms</b>                                  |                   |                                        |                                        |         |
| Fever                                            | 118 (31.6)        | 81 (31.8)                              | 37 (31.1)                              | 1.000   |
| Cough                                            | 188 (50.3)        | 130 (51.0)                             | 58 (48.7)                              | 0.739   |
| Sputum production                                | 68 (18.2)         | 47 (18.4)                              | 21 (17.6)                              | 0.887   |
| Shortness of breath                              | 12 (3.2)          | 10 (3.9)                               | 2 (1.7)                                | 0.352   |
| Nausea or vomiting                               | 6 (1.6)           | 5 (2.0)                                | 1 (0.8)                                | 0.774   |
| Abdominal pain or diarrhea                       | 21 (5.6)          | 13 (5.1)                               | 8 (6.7)                                | 0.630   |
| Loss of smell or taste                           | 15 (4.0)          | 8 (3.1)                                | 7 (5.9)                                | 0.258   |
| Myalgia                                          | 12 (3.2)          | 8 (3.1)                                | 4 (3.4)                                | 1.000   |
| Stuffy nose or runny nose                        | 53 (14.2)         | 32 (12.5)                              | 21 (17.6)                              | 0.204   |
| Headache or dizziness                            | 27 (7.2)          | 22 (8.6)                               | 5 (4.2)                                | 0.138   |
| Fatigue                                          | 73 (19.5)         | 53 (20.8)                              | 20 (16.8)                              | 0.403   |
| Pharyngeal discomfort                            | 86 (23.0)         | 63 (24.7)                              | 23 (19.3)                              | 0.292   |
| <b>Blood laboratory findings</b>                 |                   |                                        |                                        |         |
| C-reactive protein-mg/L                          | 5.4 (2.1-14.3)    | 5.2 (2.5-13.5)                         | 5.8 (1.3-17.0)                         | 0.804   |
| >10                                              | 131 (35.0)        | 84 (32.9)                              | 47 (39.5)                              | 0.245   |
| Procalcitonin, ng/mL                             | 0.04(0.02-0.07)   | 0.04(0.03-0.06)                        | 0.004(0.002-0.007)                     | 0.807   |
| <0.1                                             | 332/371 (89.5)    | 227/253 (89.7)                         | 105/118 (89.0)                         | 0.569   |
| 0.1-0.5                                          | 37/371 (10.0)     | 24/253 (9.5)                           | 13/118 (11.0)                          |         |
| >0.5                                             | 2/371 (0.5)       | 2/253 (0.8)                            | 0 (0.0)                                |         |
| Interleukin-6, pg/mL                             | 9.80 (2.77-20.52) | 9.37 (2.19-20.41)                      | 10.27 (4.53-20.51)                     | 0.455   |
| >7                                               | 223/371 (60.1)    | 150/253 (59.3)                         | 73/118 (61.9)                          | 0.720   |
| White blood cell count, × 10 <sup>9</sup> /L     | 4.83(3.92-5.99)   | 4.86(3.94-5.91)                        | 4.81(3.86-6.30)                        | 0.749   |
| <4                                               | 108 (28.9)        | 71 (27.8)                              | 37 (31.1)                              | 0.053   |
| 4-10                                             | 259 (69.3)        | 182 (71.4)                             | 77 (64.7)                              |         |
| >10                                              | 7 (1.9)           | 2 (0.8)                                | 5 (4.2)                                |         |
| Neutrophil count, × 10 <sup>9</sup> /L           | 3.02 (2.18- 4.08) | 3.04 (2.26- 3.89)                      | 2.94 (2.06- 4.23)                      | 0.821   |
| Lymphocyte count, × 10 <sup>9</sup> /L           | 1.16(0.89-1.55)   | 1.13(0.86-1.48)                        | 1.24(0.99-1.63)                        | 0.020   |

|                                     |                           |                           |                           |        |
|-------------------------------------|---------------------------|---------------------------|---------------------------|--------|
| <0.8                                | 67 (17.9)                 | 52 (20.4)                 | 15 (12.6)                 | 0.082  |
| Hemoglobin, g/L                     | 132. (123.0- 146.0)       | 131.0 (123.0- 145.0)      | 134.0 (123.5- 147.0)      | 0.350  |
| Platelet count, ×10 <sup>9</sup> /L | 157.0(122.0-193.0)        | 152.0(119.0-190.0)        | 162.0(130.0-200.5)        | 0.115  |
| <100                                | 45 (12.0)                 | 34 (13.3)                 | 11 (9.2)                  | 0.308  |
| Albumin, g/L                        | 42.7 (40.3-45.3)          | 42.7 (40.2-45.2)          | 42.5 (40.5- 45.4)         | 0.502  |
| Total bilirubin, umol/L             | 9.8 (7.7- 12.4)           | 9.6 (7.6- 12.6)           | 9.9 (7.8- 12.1)           | 0.884  |
| AST, IU/L                           | 17.0 (13.8-23.1)          | 17.2 (14.3-23.0)          | 16.1 (13.7-23.1)          | 0.186  |
| >40                                 | 32 (8.6)                  | 20 (7.8)                  | 12 (10.1)                 | 0.552  |
| ALT, U/L                            | 17.9 (12.2-28.5)          | 17.3 (12.2-28.0)          | 19.5(12.5-29.6)           | 0.522  |
| >40                                 | 52 (13.9)                 | 34 (13.3)                 | 18 (15.1)                 | 0.634  |
| Urea nitrogen, mmol/L               | 4.36 (3.59- 5.23)         | 4.41 (3.59- 5.26)         | 4.26 (3.62- 5.20)         | 0.459  |
| Creatinine, μmol/L                  | 60.9 (52.0-74.8)          | 59.4 (51.2-74.1)          | 64.4 (54.8-76.1)          | 0.054  |
| >104                                | 8 (2.1)                   | 5 (2.0)                   | 3 (2.5)                   | 0.713  |
| eGFR, ml/min                        | 111.95<br>(102.23-121.41) | 111.67<br>(102.67-119.67) | 113.49<br>(101.10-122.63) | 0.637  |
| <90                                 | 28/272 (10.3)             | 20/179 (11.2)             | 8/93 (8.6)                | 0.652  |
| Creatine kinase, U/L                | 71.0 (50.0-111.8)         | 69.0 (49.5-114.0)         | 72.0 (51.5-104.0)         | 0.792  |
| >174                                | 45 (12.0)                 | 33 (12.9)                 | 12 (10.1)                 | 0.497  |
| CK-MB, ng/ml                        | 0.50 (0.30-0.80)          | 0.50(0.30-0.80)           | 0.50 (0.3-0.90)           | 0.861  |
| >3.1                                | 7/321 (2.2)               | 6/217 (2.8)               | 1/104 (1.0)               | 0.531  |
| Myoglobin, ng/mL                    | 34.05 (21.10-57.38)       | 32.90(20.90-58.20)        | 34.60(22.65-53.45)        | 0.680  |
| >106                                | 31/320 (9.7)              | 20/217 (9.2)              | 11/103 (10.7)             | 0.833  |
| Troponin I, pg/ml                   | 3.00(0.70-7.30)           | 3.00(0.80-7.60)           | 3.05(0.48-5.78)           | 0.369  |
| >15.6                               | 28/317 (8.8)              | 22/213 (10.3)             | 6/104 (5.8)               | 0.257  |
| LDH, IU/L                           | 235.0(202.0-278.0)        | 238.0(205.5-283.0)        | 232.0(200.0-269.5)        | 0.265  |
| >245                                | 168 (44.9)                | 120 (47.1)                | 48 (40.3)                 | 0.264  |
| Prothrombin time, s                 | 11.1 (10.8- 11.6)         | 11.1 (10.8- 11.6)         | 11.2 (10.8- 11.6)         | 0.612  |
| D-dimer, mg/L                       | 0.39 (0.25-0.61)          | 0.38 (0.24-0.59)          | 0.41(0.26-0.69)           | 0.537  |
| >0.55                               | 109 (29.1)                | 73 (28.6)                 | 36 (30.3)                 | 0.807  |
| FDPs, ug/ml                         | 2.70 (1.70- 5.35)         | 2.70 (1.70- 4.10)         | 3.10 (1.55- 5.40)         | 0.190  |
| SARS-COV-2 IgM (S/CO)               | 0.21 (0.06- 0.99)         | 0.15 (0.05- 0.68)         | 0.41 (0.13- 1.95)         | <0.001 |
| IgM Positive                        | 93 (24.9)                 | 49 (19.2)                 | 44 (37.0)                 | <0.001 |
| SARS-COV-2 IgG (S/CO)               | 1.38 (0.15- 9.85)         | 0.73 (0.11- 4.32)         | 4.16 (0.51- 33.79)        | <0.001 |
| IgG Positive                        | 199 (53.2)                | 121 (47.5)                | 78 (65.5)                 | 0.002  |
| <b>Viral load (Ct value) *</b>      |                           |                           |                           |        |
| ORF1ab gene                         | 23.0 (19.0- 27.0)         | 22.0 (19.0- 26.0)         | 25.0 (21.0- 30.0)         | 0.001  |
| N gene                              | 20.0 (16.0- 24.8)         | 19.0 (15.0- 23.0)         | 22.0 (18.5- 28.0)         | <0.001 |
| <b>Outcomes</b>                     |                           |                           |                           |        |
| Severe illness                      | 20 (5.3)                  | 14 (5.5)                  | 6 (5.0)                   | 0.858  |
| Mechanical ventilation              | 2 (0.5)                   | 1 (0.4)                   | 1 (0.8)                   | 1.000  |

1. Data were expressed as median (interquartile range), n (%) or n/N (%). Comparisons between groups were made using Mann-Whitney U-test, or Chi-Square test, as appropriate.

2. COPD, chronic obstructive pulmonary disease; CK-MB, creatine kinase-myocardial band; AST, Aspartate aminotransferase; ALT, Alanine aminotransferase; eGFR, estimated glomerular filtration rate; LDH, Lactate dehydrogenase FDPs, fibrinogen degradation products; Ct, cycle threshold; SARS-COV-2, severe acute respiratory syndrome coronavirus 2.

\*SARS-COV-2 viral load from upper respiratory samples was evaluated by using quantitative reverse transcription polymerase chain reaction (qRT-PCR). The Ct value from qRT-PCR was used to represent the viral load.

**Table S2 Factors associated with early viral clearance**

|                                               | <b>Crude OR<br/>(95% CI)</b> | <b>p value</b> | <b>Adjusted OR (95%<br/>CI)</b> | <b>P value</b> |
|-----------------------------------------------|------------------------------|----------------|---------------------------------|----------------|
| Female sex<br>(vs male)                       | 1.37 (0.88-2.14)             | 0.158          | 1.42 (0.89-2.27)                | 0.143          |
| Age $\geq$ 60 years<br>(vs 18 to 59)          | 0.66 (0.40-1.07)             | 0.098          | 1.01 (0.53-1.92)                | 0.973          |
| Comorbidity present (vs<br>not present)       | 0.85 (0.52-1.38)             | 0.502          | 1.11 (0.63-1.92)                | 0.725          |
| Vaccination status<br>(vs unvaccinated)       |                              |                |                                 |                |
| Partially vaccinated                          | 1.54 (0.80-2.97)             | 0.196          | 1.36 (0.66-2.76)                | 0.400          |
| Fully vaccinated                              | 2.08 (1.24-3.58)             | 0.006          | 2.23 (1.17-4.35)                | 0.017          |
| Time from illness onset to<br>admission, days | 0.96 (0.87-1.04)             | 0.327          | 0.89 (0.80-0.98)                | 0.018          |
| Viral load*                                   | 1.07 (1.04-1.11)             | <0.001         | 1.10 (1.06-1.14)                | <0.001         |

\*The Ct value from quantitative reverse transcription polymerase chain reaction was used to represent the viral load of SARS-COV-2 in the upper respiratory tract.

OR , odds ratio; CI, confidence intervals
